# Supplementary material
Source: PubMed Central journal article supplement (PMC8993762)
Supplement: mmc1.pdf [file mmc1.pdf]

## SUPPLEMENTAL MATERIAL

### The Pathogenesis and Long-Term Consequences of COVID-19 Cardiac Injury: State-of-the-Art Review

Bhurint Siripanthong, BA(Cantab)<sup>1\*</sup>; Babken Asatryan, MD, PhD<sup>2\*</sup>; Thomas C. Hanff, MD<sup>3</sup>; Salman R. Chatha, MBBS, MSc<sup>5</sup>; Mohammed Y Khanji MBBCh PhD<sup>4, 5, 6</sup>; Fabrizio Ricci; MD, PhD, MSc, FEACVI<sup>7, 8, 9</sup>; Daniele Muser, MD, PhD<sup>10</sup>; Victor A. Ferrari, MD<sup>11</sup>; Saman Nazarian, MD, PhD<sup>12</sup>; Pasquale Santangeli, MD, PhD<sup>12</sup>; Rajat Deo, MD, MTR<sup>12</sup>; Leslie T. Cooper Jr, MD, FAHA<sup>13</sup>; Saidi A. Mohiddin, MBChB, FRCP, FESC<sup>5, 6</sup>; C. Anwar A. Chahal, MBChB, MRCP, PhD<sup>5, 12, 14, 15</sup>

1. School of Clinical Medicine, University of Cambridge, Cambridge CB2 0SP, UK
2. Department of Cardiology, Inselspital, Bern University Hospital, University of Bern, Bern, Switzerland
3. Department of Medicine, Cardiovascular Division, Perelman School of Medicine, University of Pennsylvania, Pennsylvania, PA
4. Newham University Hospital, Barts Health NHS Trust, London, E13 8SL, United Kingdom
5. Barts Heart Centre, St Bartholomew's Hospital, Barts Health NHS Trust, London, EC1A 7BE, UK
6. NIHR Barts Biomedical Research Centre, William Harvey Research Institute, Queen Mary University of London, Charterhouse Square, London, EC1M 6BQ, UK
7. Department of Neuroscience, Imaging and Clinical Sciences, "G.d'Annunzio" University of Chieti-Pescara, Via Luigi Polacchi, 11 - 66100 Chieti
8. Casa di Cura Villa Serena, Città Sant'Angelo, Pescara, Italy
9. Department of Clinical Sciences, Lund University, E-205 02 Malmö, Sweden
10. Dipartimento Cardiotoracico, U.O.C. di Cardiologia, Presidio Ospedaliero Universitario "Santa Maria Della Misericordia", Piazzale Santa Maria Della Misericordia 15, 33100, Udine, Italy.
11. Perelman School of Medicine, University of Pennsylvania, Philadelphia, PA
12. Electrophysiology Section, Division of Cardiovascular Medicine, Perelman School of Medicine at the University of Pennsylvania, Philadelphia, Pennsylvania, USA
13. Mayo Clinic, Jacksonville, Florida, USA
14. Department of Cardiovascular Medicine, Mayo Clinic, Rochester, MN, USA
15. WellSpan Center for Inherited Cardiovascular Diseases, WellSpan Health, PA, USA

\* BA and BS contributed equally and are co-first authors.

**Table of Content**

**page**

**Supplemental Table 1**

1.1. Reports on surviving patients with COVID-19-related myocarditis/myocardial injury.....3

1.2. Reports on case series of patients with COVID-19-related myocarditis/myocardial injury.....21

**Supplemental Table 2**.....24

**References**.....27

**Supplemental Table 1.**

**1.1. Reports on surviving patients with COVID-19-related myocarditis/myocardial injury**

| Publication             | Patient          | Presenting complaints                                                        | Examination/Investigation                                                                                                                                                                                                                                                                                                                                      | Management                                                                                                                                                                 | Complication(s)                                                                                                                                                      |
|-------------------------|------------------|------------------------------------------------------------------------------|----------------------------------------------------------------------------------------------------------------------------------------------------------------------------------------------------------------------------------------------------------------------------------------------------------------------------------------------------------------|----------------------------------------------------------------------------------------------------------------------------------------------------------------------------|----------------------------------------------------------------------------------------------------------------------------------------------------------------------|
| Kim et al.(1)           | 21 years, female | Fever, productive cough, diarrhea, shortness of breath                       | Troponin I = 1.26 ng/mL (<0.3 ng/mL)<br>NT-proBNP = 1929 pg/mL (<125 pg/mL)<br>ECG: multiple PVCs, intraventricular conduction delay<br>Echo: severely reduced LVEF<br>Cardiac CT: hypertrophic myocardium due to edema with subendocardial perfusion defect on lateral LV<br>CMR: diffused high SI in LV on T2, myocardial wall thickening and transmural LGE | N/A                                                                                                                                                                        | N/A                                                                                                                                                                  |
| Paul et al.(2)          | 35 years, male   | Chest pain and fatigue, afebrile                                             | Troponin I = 2885 ng/L<br>ECG: repolarization changes in the precordial ECG leads<br>Echo: normal LVEF without pericardial effusion<br>CMR: subepicardial LGE in the inferior and lateral walls                                                                                                                                                                | Ramipril 5 mg<br>Bisoprolol 5 mg                                                                                                                                           | None<br><br>3 weeks later asymptomatic and troponin levels back to normal.                                                                                           |
| Zeng et al.(3)          | 63 years, male   | Productive cough, fever, shortness of breath and chest tightness on exertion | Troponin I = 11.37 g/L<br>NT-proBNP = 22,600 pg/mL<br>IL-6 = 272.4 pg/mL (raised)<br>ECG: sinus tachycardia, no ST segment elevation<br>Echo: LVEF = 32%, diffuse myocardial dyskinesia and enlarged LV                                                                                                                                                        | Respiratory support<br>Lopinavir-ritonavir<br>Interferon alpha 1b<br>Methylprednisolone<br>IVIg<br>Piperacillin-Tazobactam<br>Continuous renal replacement therapy<br>ECMO | LVEF improved to 68%<br>LV wall thickness returned to normal<br>Impaired right cardiac function<br>Septic shock<br>DIC<br>Death on 33 <sup>rd</sup> day of admission |
| Irabien-Ortiz et al.(4) | 59 years, female | Fever, angina chest pain                                                     | Hypoperfusion<br>ECG: concave diffuse ST elevation and PR depression<br>Troponin T = 220-1100 ng/dL (elevated)<br>NT-proBNP = 4421 ng/L                                                                                                                                                                                                                        | CPR<br>Emergent pericardiocentesis<br>High dose vasopressors<br>ECMO via femoral artery<br>IVIg                                                                            | Normal biventricular function regained in a few days<br>Continued dyspnea                                                                                            |

|                           |                  |                                                                         |                                                                                                                                                                                                                                                                                                                                                                                                                                                                                                  |                                                                                                                                |                                                                                                                                                                                                                                                                                 |
|---------------------------|------------------|-------------------------------------------------------------------------|--------------------------------------------------------------------------------------------------------------------------------------------------------------------------------------------------------------------------------------------------------------------------------------------------------------------------------------------------------------------------------------------------------------------------------------------------------------------------------------------------|--------------------------------------------------------------------------------------------------------------------------------|---------------------------------------------------------------------------------------------------------------------------------------------------------------------------------------------------------------------------------------------------------------------------------|
|                           |                  |                                                                         | Echo: moderate concentric hypertrophy, reduced intraventricular volumes, preserved LVEF, pericardial effusion                                                                                                                                                                                                                                                                                                                                                                                    | Prednisolone<br>Lopinavir/ritonavir                                                                                            |                                                                                                                                                                                                                                                                                 |
| Doyen et al. (2020)(5)    | 69 years, male   | Fever, cough, dyspnea, respiratory distress syndrome and severe hypoxia | Troponin I = 9002 ng/L (<40)<br>ECG: new diffuse inverted T waves<br>Echo: mild LVH with preserved LVEF and normal wall motion<br>Coronary angiography: no occlusion<br>CMR: subepicardial LGE of the apex and inferolateral wall                                                                                                                                                                                                                                                                | Mechanical ventilation<br>hydrocortisone                                                                                       | Discharged from ICU after 3 weeks                                                                                                                                                                                                                                               |
| Inciardi et al. (2020)(6) | 53 years, female | Dry cough, severe fatigue, afebrile                                     | ECG: diffuse ST elevation<br>Elevated troponin T and elevated NT-proBNP<br>Coronary angiography: no occlusion<br>CMR: increased wall thickness with diffuse biventricular hypokinesis, especially in the apical segments, and severe left ventricular dysfunction (left ventricular ejection fraction of 35%). Short tau inversion recovery and T2-mapping sequences showed marked biventricular myocardial interstitial edema, and there was also diffuse LGE of the entire biventricular wall. | Dobutamine<br>Lopinavir/Ritonavir<br>Steroids<br>chloroquine                                                                   | N/A                                                                                                                                                                                                                                                                             |
| Trogen et al. (2020) (7)  | 17 years, male   | Fever, neck pain, abdominal pain, diarrhea and vomiting                 | BP 79/66 mmHg, HR 150<br>Troponin I 6.17 ng/mL<br>BNP = 2124 pg/mL<br>ECG: sinus tachycardia with inverted T waves in the inferior leads<br>Echo: reduced LVEF, no pericardial effusion<br>CMR: LVEF 40%, mid-wall LGE in inferior LV-RV junction corresponding to an area of increased SI in T2 and area of hypokinesia.                                                                                                                                                                        | Enoxaparin (for prophylaxis against VTE risks in COVID-19 patients)<br>Ibuprofen<br>Acetaminophen<br>Oxygen (nasal cannula 4L) | Normalization of BP on day 1<br>O <sub>2</sub> desaturation on day 2<br>Discharged on day 5<br>Follow-up 1 week post discharge: LVEF 59%<br>Residual myocardial dysfunction (low GLS, diminished signals of the mitral valve annulus), persistent T wave inversion in lead III. |

|                    |                  |                                                          |                                                                                                                                                                                                                                                                        |                                                                                                                       |                                                                                        |
|--------------------|------------------|----------------------------------------------------------|------------------------------------------------------------------------------------------------------------------------------------------------------------------------------------------------------------------------------------------------------------------------|-----------------------------------------------------------------------------------------------------------------------|----------------------------------------------------------------------------------------|
| Sardari et al.(8)  | 31 years, male   | Dyspnea on exertion, low-grade fever                     | BP 110/80, HR 70, RR 18<br>Troponin T < 0.03 ng/mL<br>Echo: mild LV dysfunction<br>CMR: LVEF 50%, Subepicardial LGE in the mid inferior wall and edema/inflammation in the mid inferoseptal and inferior wall                                                          | Bisoprolol<br>Lisinopril                                                                                              | Myocarditis presented 3 weeks after discharge (COVID-19)                               |
| Kesici et al.(9)   | 2 years, male    | Nausea, vomiting, and poor oral intake                   | Low BP, hepatomegaly<br>CXR: pleural effusion, cardiomegaly<br>Echo: severely reduced EF<br>EMB: dilated cardiomyopathy, secondary to viral myocarditis                                                                                                                | Inotropes<br>ECMO<br>Extrapulmonary CPR                                                                               | Fatal fulminant myocarditis (suspected)                                                |
| Besler et al.(10)  | 20 years, male   | Fever, chest pain                                        | BP 146/63<br>HR 111<br>Troponin I = 7.621 ng/mL (<0.045 ng/mL)<br>CK-MB = 21.92 mcg/L<br>NT-proBNP = 1525 ng/L (<125 ng/L)<br>CMR: subepicardial LGE of the posterolateral wall in the mid ventricle, also high SI in the same area in T2 short tau inversion recovery | Hydroxychloroquine, azithromycin, ceftriaxone, tigecycline, favipiravir, colchicine                                   | Full recovery and discharged on day 7                                                  |
| Chiu et al.(11)    | 10 years, male   | Fever, fatigue, diarrhea, cough, rash and conjunctivitis | BP 75/44<br>NT-proBNP = 9477 pg/mL<br>Echo: severely reduced LVEF                                                                                                                                                                                                      | Fluid resuscitation<br>Dopamine                                                                                       | Patient still critically ill at referral to another institution                        |
| Oleszak et al.(12) | 52 years, male   | Cough, dyspnea, single episode of hemoptysis             | BP 161/109<br>HR 118, RR 20<br>ECG: sinus tachycardia, LV hypertrophy, bi-atrial enlargement, QTc 449<br>Troponin T 0.017 ng/mL<br>NT-proBNP = 1220 pg/mL<br>Echo: LVEF 10-15% with global dilatation                                                                  | Hydroxychloroquine<br>Azithromycin<br>Intravenous furosemide<br>High flow O <sub>2</sub> via nasal cannula (15 L/min) | LVEF improved to 20-25%<br>NT-proBNP = 802 pg/mL<br>Hemodynamically stable             |
| Lara et al.(13)    | 12 years, female | Fatigue, fever, abdominal pain, vomiting                 | BP 60/30<br>HR 40<br>RR 24<br>ECG: complete heart block with atrial rate of 150 bpm                                                                                                                                                                                    | CRP (2 mins) – return of spontaneous circulation<br>Epinephrine infusion<br>Milrinone<br>IVIG                         | Steadily improved<br>Extubated day 4<br>Normal cardiac function on day 10<br>Discharge |

|                                  |                  |                                   |                                                                                                                                                                                                                                                                                                  |                                                                                                                                                                                                                                                                                                        |                                                                                          |
|----------------------------------|------------------|-----------------------------------|--------------------------------------------------------------------------------------------------------------------------------------------------------------------------------------------------------------------------------------------------------------------------------------------------|--------------------------------------------------------------------------------------------------------------------------------------------------------------------------------------------------------------------------------------------------------------------------------------------------------|------------------------------------------------------------------------------------------|
|                                  |                  |                                   | Troponin I >50 mg/mL<br>BNP 2652 pg/mL<br>Echo: LVEF 27%                                                                                                                                                                                                                                         |                                                                                                                                                                                                                                                                                                        |                                                                                          |
| Coyle et al. (2020) (14)         | 57 years, male   | Severe hypoxia                    | ECG: sinus tachycardia<br>Raised troponin I<br>Raised NT-proBNP<br>Echo: LVEF 35-40%, moderate diffuse hypokinesia<br>CMR: LGE of the midwall of the basal inferolateral segments, high SI of both atria and ventricles in T2                                                                    | Hydroxychloroquine<br>Azithromycin<br>Ceftriaxone<br>Endotracheal intubation<br>Mechanical ventilation with neuromuscular blockade<br>Methylprednisolone (for myocarditis)<br>Colchicine<br>Milrinone infusion and norepinephrine for cardiogenic shock<br>14-day course of aldose reductase inhibitor | Extubation on day 10<br>Discharged on day 19                                             |
| Rehman et al. (2020)(15)         | 39 years, male   | Chest pain worsened with exertion | ECG: ST elevation in lead I, aVL, ST depression in aVR, mild J point elevation and T waves inversion in leads II, III, and aVF<br>Troponin: 6.24 ng/mL<br>Coronary angiography: no occlusion<br>Echo: no wall motion abnormality and LVEF 55-60%, no pericardial effusion<br>NT-proBNP 379 pg/mL | Acetaminophen                                                                                                                                                                                                                                                                                          | Chest pain improved after cardiac catheterization<br>Discharged with acetaminophen alone |
| Yokoo et al. (2020)(16)          | 81 years, male   | Fever, dyspnea                    | ECG: sinus rhythm<br>Troponin T 33 pg/mL (<5 pg/mL)<br>Echo: LVEF 35%<br>CMR: mid-wall LGE in the LV base septum wall, diffuse hypokinesia                                                                                                                                                       | Antibiotics<br>Steroids<br>Anticoagulation                                                                                                                                                                                                                                                             | Discharged 3 weeks after admission with 5 days of anticoagulants                         |
| Bernal-Torres et al. (2020) (17) | 38 years, female | Palpitations, general malaise     | BP 98/54<br>HR 137                                                                                                                                                                                                                                                                               | O <sub>2</sub> therapy<br>Methylprednisolone<br>IVIG                                                                                                                                                                                                                                                   | Discharged on day 16 with heart failure management                                       |

|                   |                  |                                                   |                                                                                                                                                                                                                                                |                                                                                                                                      |                                                                                                                                                                                                   |
|-------------------|------------------|---------------------------------------------------|------------------------------------------------------------------------------------------------------------------------------------------------------------------------------------------------------------------------------------------------|--------------------------------------------------------------------------------------------------------------------------------------|---------------------------------------------------------------------------------------------------------------------------------------------------------------------------------------------------|
|                   |                  |                                                   | ECG: diffuse and concave ST elevation with PR segment depression<br>Troponin I 1190 ng/L (<14 ng/L)<br>BNP 13000 pg/mL (<100 pg/mL)<br>Echo: LVEF 30% mild pericardial effusion<br>CMR: inferobasal LGE with increased SI in T2 transmural     | Hydroxychloroquine<br>Azithromycin<br>Lopinavir/ritonavir<br>Norepinephrine,<br>dobutamine,<br>levosimendan<br>Furosemide            |                                                                                                                                                                                                   |
| Bonnet et al.(18) | 27 years, male   | Respiratory distress                              | Troponin I 100 ng/L<br>NT-proBNP 9,300 pg/mL<br>Echo: LVEF 20%<br>Coronary CT angiography: no occlusion                                                                                                                                        | Diuretics<br>Noninvasive ventilation                                                                                                 | Discharged on day 9<br>With treatment for heart failure management                                                                                                                                |
| Auer et al.(19)   | 42 years, female | Dyspnea                                           | BP 109/62<br>HR 75<br>ECG: T wave inversion in leads III, aVF<br>Troponin I 28.1 ng/L (<16 ng/L)<br>NT-proBNP 636.8 pg/mL (<125 pg/mL)<br>Autopsy: lymphocytic infiltrates of the myocardium with anti-CD3 antibodies present                  | O <sub>2</sub> therapy                                                                                                               | Fatal ventricular fibrillation                                                                                                                                                                    |
| Volis et al.(20)  | 21 years, male   | Fever                                             | BP 130/70<br>HR 110<br>Hepatosplenomegaly<br>Troponin I 965 ng/L (<34 ng/L)<br>ECG: ST depression and T wave inversion in lead III, PR depression in leads II and III                                                                          | Symptomatic relief only                                                                                                              | Normalization of troponin,<br>Echo showed no wall motion abnormalities and normal LVEF (65%)                                                                                                      |
| Dahl et al.(21)   | 37 years, male   | Fever, headache, unilateral painful neck swelling | BP 119/76<br>HR 119<br>RR 22<br>ECG: sinus tachycardia, flattened T waves<br>Troponin T 1,959 ng/L (<15)<br>NT-proBNP 11,169 ng/L (<85)<br>Echo: reduced LVEF (to 40%)<br>CMR: diffuse myocardial edema<br>CT angiogram: no coronary occlusion | O <sub>2</sub> therapy 3L/min<br>Fluid resuscitation<br>Low-dose norepinephrine<br>Furosemide<br>Continuous positive airway pressure | Discharged on day 11<br>1 week after discharge readmitted with Bell's palsy (thought to be due to Lyme's disease – later r/o with serology)<br>Later improved but still lower exercise tolerance. |

|                                |                  |                                                                              |                                                                                                                                                                                                                                                                                                                                                                                                                                                                                        |                                                                                                           |                                                                                                                                                                                |
|--------------------------------|------------------|------------------------------------------------------------------------------|----------------------------------------------------------------------------------------------------------------------------------------------------------------------------------------------------------------------------------------------------------------------------------------------------------------------------------------------------------------------------------------------------------------------------------------------------------------------------------------|-----------------------------------------------------------------------------------------------------------|--------------------------------------------------------------------------------------------------------------------------------------------------------------------------------|
| Hu et al.(22)                  | 37 years, male   | Chest pain, dyspnea, diarrhea                                                | BP 80/50<br>CXR: cardiothoracic ratio 0.7<br>ECG: ST elevation in III, aVF<br>Troponin T 10,000 ng/L<br>BNP 21025 ng/L<br>CT coronary angiogram: no occlusion<br>Echo: LVEF 27%                                                                                                                                                                                                                                                                                                        | Methylprednisolone<br>IVIG<br>Norepinephrine<br>Diuretics (toracemide and furosemide)<br>Milrinone        | At 1 week:<br>Echo: LVEF 66%<br>CXR: Cardiothoracic ratio 0.49<br>Troponin T 220.5 ng/L<br>BNP 1587 ng/L<br>At 3 weeks, all cardiac enzyme/biomarkers were in the normal range |
| Sala et al. (2020) (23)        | 43 years, female | Chest pain, dyspnea                                                          | BP 120/80<br>HR 79<br>ECG: ST segment elevation in V1-V2 and aVR, reciprocal ST depression in V4-V6 with diffused U waves.<br>Troponin T: 135 ng/L<br>NT-proBNP 512 pg/mL<br>Echo: LVEF 43%, inferolateral wall hypokinesis<br>CT coronary angiogram: no occlusion<br>CMR (day 7): LVEF 64%<br>Mild hypokinesia at basal and mid left ventricular segments, no LGE<br>EMB: diffused T lymphocytic infiltrates > 7/mm <sup>2</sup> , large interstitial edema, limited foci of necrosis | Lopinavir/ritonavir<br>Hydroxychloroquine                                                                 | Patient discharged with no symptoms on day 13                                                                                                                                  |
| Papageorgiou et al. (2020)(24) | 43 years, male   | Fever and cough                                                              | BP 85/70<br>HR 130<br>ECG: sinus tachycardia, diffuse ST elevation<br>Tropinin T: 590 ng/L<br>NT-proBNP: 6100 ng/L<br>Echo: LVEF 15%<br>EMB: no lymphocytic infiltrates                                                                                                                                                                                                                                                                                                                | Aspirin, ticagrelor, fondaparinux<br>Levosimendan<br>Norepinephrine<br>Milrinone<br>MCS (impella)<br>ECMO | Day 7: LVEF normalized                                                                                                                                                         |
| Spano et al. (2020)(25)        | 49 years, male   | Dyspnea, NYHA 3, general weakness, intermittent epigastric pain and nocturia | Elevated troponin and NT-proBNP<br>ECG: dynamic T wave changes<br>Echo: Diffuse hypokinesia with severely depressed left and right ventricular function                                                                                                                                                                                                                                                                                                                                | -                                                                                                         | -                                                                                                                                                                              |



|                         |                  |                                                           |                                                                                                                                                                                                                                                    |                                                                                                             |                                                                                                                                                                                                         |
|-------------------------|------------------|-----------------------------------------------------------|----------------------------------------------------------------------------------------------------------------------------------------------------------------------------------------------------------------------------------------------------|-------------------------------------------------------------------------------------------------------------|---------------------------------------------------------------------------------------------------------------------------------------------------------------------------------------------------------|
|                         |                  |                                                           | CT coronary angiogram: no occlusion<br>CMR: diffuse thickening of the myocardium and pericardium due to edema. Diffuse LGE. Impaired global myocardial strain.                                                                                     |                                                                                                             |                                                                                                                                                                                                         |
| Ashok et al. (2020)(26) | 53 years, male   | Fever and abdominal pain                                  | HR 30-40<br>ECG: atrioventricular block (Mobitz type II), then complete AV heart block<br>Echo: mild LV impairment                                                                                                                                 | Isoprenaline<br>Dual chamber pacemaker (DDD-R) implantation<br>IV antibiotics                               | Discharged on day 10<br><br>Follow-up at 6 weeks: pacemaker checks satisfactory, pacing-dependent with > 95% ventricular pacing<br>Heart block as a potential side effect from COVID-19 myocarditis (?) |
| Gnecchi et al.(27)      | 16 years, male   | Chest pain radiating to left arm, fever                   | ECG: inferolateral ST elevation<br>Echo: hypokinesia of the inferior and inferolateral segments of the LV, LVEF 52%<br>Troponin I 16,862 ng/L<br>CMR: subepicardial increased SI in T2 Short-T1 Inversion Recovery as well as LGE in the same area | Ibuprofen<br>Hydroxychloroquine<br>Antivirals                                                               | Asymptomatic and well by day 12                                                                                                                                                                         |
| Richard et al. (28)     | 28 years, female | Lethargy, hematemesis                                     | BP 70/38<br>HR 144<br>ECG: sinus tachycardia, nonspecific ST changes in the lateral leads with possible septal infarct<br>Echo: LVEF 26-30%<br>CT coronary angiogram: no occlusion<br>CMR: myocardial necrosis, fibrosis and hyperemia             | Intubation<br>IV dobutamine and heparin<br>LVAD (Impella) – in lieu of norepinephrine<br>Methylprednisolone | On day 3: LVEF > 55%<br>Impella removed and dobutamine weaned off                                                                                                                                       |
| Craver et al.(29)       | 17 years, male   | Severe headache, dizziness, nausea and vomiting, collapse | Autopsy findings:<br>Diffuse inflammatory infiltrates composed of <i>lymphocytes</i> , macrophages with prominent eosinophils. Primarily in the interstitium of both the right and left ventricles.                                                | Patient failed to respond to ALS                                                                            | Fatal                                                                                                                                                                                                   |
| Khalid et al.(30)       | 76 years, female | Fever, cough, dyspnea                                     | BP 110/53<br>HR 124                                                                                                                                                                                                                                | Intubation<br>Norepinephrine                                                                                | Recovery of LVEF to 50%                                                                                                                                                                                 |

|                            |                  |                                                     |                                                                                                                                                                                                                                                                                         |                                                                                                                            |                                                                             |
|----------------------------|------------------|-----------------------------------------------------|-----------------------------------------------------------------------------------------------------------------------------------------------------------------------------------------------------------------------------------------------------------------------------------------|----------------------------------------------------------------------------------------------------------------------------|-----------------------------------------------------------------------------|
|                            |                  |                                                     | Troponin: 503 ng/L (<14)<br>NT-proBNP: 35,000 pg/mL (<450 pg/mL)<br>ECG: normal sinus rhythm<br>Echo: LVEF 25-30%                                                                                                                                                                       | Tocilizumab<br>IVIg                                                                                                        |                                                                             |
| Khatri et al.(31)          | 50 years, male   | Fevers, non-productive cough, dyspnea, near-syncope | ECG: ST segment changes<br>Hs-troponin: 544 ng/L<br>Coronary angiogram: no occlusion<br>Echo: severe LV dysfunction, pericardial effusion                                                                                                                                               | IV dobutamine, vasopressin and norepinephrine<br>Enteral hydroxychloroquine<br>Remdesivir<br>IVIg<br>IV methylprednisolone | Patient passed away on day 4 due to multi-organ failure                     |
| Dalen et al. (2020) (32)   | 55 years, female | Fatigue, near syncope, chest discomfort             | BP 102/72<br>HR 100<br>ECG: sinus tachycardia, insignificant ST elevation in inferior leads and T wave inversion in the precordial leads.<br>Troponin T: 108 ng/L<br>NT-proBNP: 1025 ng/L<br>Echo: reduced LVEF, pericardial effusion<br>CMR: epicardial LGE in the anterolateral wall. | Norepinephrine<br>Pericardiocentesis for cardiac tamponade                                                                 | Discharged on day 17<br>Day 39: showed full recovery                        |
| Faridan et al. (2021)(33)  | 78 years, female | Weakness, fever                                     | BP 92/52<br>HR 110<br>ECG: occasional premature ventricular contractions with no features of ischemia<br>Troponin I raised                                                                                                                                                              | Remdesivir<br>Dexamethasone                                                                                                | N/A                                                                         |
| Hussain et al. (2020) (34) | 51 years, male   | Dry cough, fatigue, dyspnea                         | BP 141/89<br>HR 97<br>ECG: diffuse ST elevation<br>Echo: marked decrease in ventricular systolic function and LVEF 20%<br>Coronary angiogram: non-obstructive<br>Troponin 0.29 ng/mL<br>NT-proBNP 1,287 pg/mL                                                                           | Indomethacin<br>CPAP<br>IV methylprednisolone<br>Colchicine<br>Dobutamine<br>Fluid resuscitation<br>Antivirals             | LVEF after treatment 23%<br>Conditions deteriorating at the time of report. |

|                           |                  |                                                                 |                                                                                                                                                                                                                                                                                                                                                                                            |                                                                                         |                                                                                                                                                                                                                                                                |
|---------------------------|------------------|-----------------------------------------------------------------|--------------------------------------------------------------------------------------------------------------------------------------------------------------------------------------------------------------------------------------------------------------------------------------------------------------------------------------------------------------------------------------------|-----------------------------------------------------------------------------------------|----------------------------------------------------------------------------------------------------------------------------------------------------------------------------------------------------------------------------------------------------------------|
| Sheikh et al. (2021)(35)  | 28 years, male   | Cough, worsening dyspnea and chest pain                         | BP 107/72<br>HR 103<br>ECG: accelerated junctional rhythm with retrograde conduction<br>Echo: LVEF 30%                                                                                                                                                                                                                                                                                     | Metoprolol,<br>Lisinopril<br>Low-dose aspirin                                           | Discharged on day 16 (complicated with new onset cranial/central diabetes insipidus)                                                                                                                                                                           |
| Beaudry et al. (2021)(36) | 15 years, female | Epigastric pain, loss of appetite, nasal congestion, rhinorrhea | BP 81/52<br>ECG: sinus tachycardia<br>Echo: severely diminished LVEF<br>Pro-BNP 8328 pg/mL<br>Troponin 2.48 ng/mL<br>Autopsy: diffuse lymphoplasmacytic inflammatory infiltrate, inflammation of the venules, lymphatics and small arterioles.                                                                                                                                             | IVIg<br>BiPAP and then intubation<br>Norepinephrine<br>Vasopressin<br>Bolus epinephrine | Patient sustained 3 PEA, the last of which she did not achieve return of spontaneous circulation                                                                                                                                                               |
| Garot et al.(37)          | 18 years, male   | Cough, fever, fatigue and myalgia.                              | ECG: sinus tachycardia, inverted T waves in V2-V4<br>Echo: LVEF 30%, increased LV wall thickness, diffuse hypokinesia<br>NT-proBNP: 11,719 pg/mL<br>Troponin: 11,716 IU/mL<br>CMR: Short T1 inversion recovery (STIR) showed marked extensive hypersignal of the LV basal posterolateral wall (edema), subepicardial nodular LGE of the LV basal posterolateral wall. Lake-Louise positive | Acetaminophen<br>Hydroxychloroquine<br>Nasal oxygen<br>Norepinephrine                   | CMR on day 14 showed: LVEF 54% clear decrease of focal myocardial edema, stable LGE lesions in the subepicardium of the posterolateral wall. Patient had complete clinical recovery with normal respiratory function and hemodynamics<br>Discharged on day 15. |
| Milla-Godoy et al. (38)   | 45 years, female | Diarrhea, nausea, vomiting                                      | BP 113/85<br>HR 116<br>ECG: sinus tachycardia, diffuse ST elevation in I, II, aVL, V3-V6<br>Troponin T: 0.43 ng/mL (<0.02)<br>NT-proBNP: 4,585 pg/mL (<450)<br>Echo: LVEF 10% with global hypokinesia                                                                                                                                                                                      | Intubation<br>Norepinephrine<br>Phenylephrine, dopamine<br>IVIg<br>Methylprednisolone   | Patient became asystolic and passed away after 15 mins of resuscitation (including 4 doses of IV epinephrine and 1 IV bicarbonate)                                                                                                                             |
| Lozano-Gomez et al.(39)   | 53 years, male   | Fever, dyspnea                                                  | BP 94/59<br>HR 133<br>ECG: sinus tachycardia, diffuse ST segment elevation                                                                                                                                                                                                                                                                                                                 | Dobutamine<br>Intubation<br>Norepinephrine                                              | Patient developed new-onset AF, LVEF declined to <10% and raised cardiac                                                                                                                                                                                       |

|                         |                  |                                      |                                                                                                                                                                                                          |                                                                                                                              |                                                                                                                                                         |
|-------------------------|------------------|--------------------------------------|----------------------------------------------------------------------------------------------------------------------------------------------------------------------------------------------------------|------------------------------------------------------------------------------------------------------------------------------|---------------------------------------------------------------------------------------------------------------------------------------------------------|
|                         |                  |                                      | Echo: LVEF 35%, slightly dilated LV                                                                                                                                                                      | Amiodarone and electrical cardioversion                                                                                      | enzymes. Patient was anuric despite aggressive furosemide.                                                                                              |
| Naneishivili et al.(40) | 44 years, female | Fever, lethargy, myalgia, syncope    | BP 85/40<br>ECG: no features of ischemia<br>Echo: LVEF 37%, pericardial effusion<br>Troponin I 639 ng/L                                                                                                  | Methylprednisolone<br>Milrinone<br>norepinephrine                                                                            | Normalization of LVEF by day 3.<br>Patient discharged on day 41.                                                                                        |
| Cuomo et al. (2020)(41) | 49 years, female | Fever, chest pain, cough             | ECG: right bundle branch block<br>Troponin: 820 ng/L<br>BNP: 950 pg/mL<br>Echo: LVEF 45%<br>CMR: widespread increase in T2 SI and moderate pericardial effusion at the posterior lateral wall of the LV. | Sotalol<br>Acetylsalicylic acid                                                                                              | LVEF improved to 55% on day 7, patient discharged on day 12                                                                                             |
| Chitturi et al.(42)     | 65 years, female | Fever, dry cough, exertional dyspnea | Troponin 1.682 ng/mL (<0.04)<br>BNP 401 pg/mL (<100)<br>ECG: new onset T wave inversion in leads V1 and V2<br>Echo: LVEF 25%, RV systolic function with paradoxical septal motion                        | Remdesivir<br>Rapid sequence intubation<br>Tocilizumab<br>Norepinephrine<br>Vasopressin<br>Dobutamine<br>Sodium bicarbonate  | LVEF eventually improved to 64% within 24 hrs of treatment<br>Patient then discharged from ICU to a long-term acute care facility for a ventilator wean |
| Tseng et al.(43)        | 5 years, male    | Fatigue, vomiting                    | Troponin I 1658 ng/L (<7)<br>BNP 2298 pg/mL (<101)<br>Echo: severely reduced LVEF                                                                                                                        | IVIg<br>Amiodarone<br>Electrical cardioversion<br>ECMO                                                                       | Decannulate from ECMO on day 5<br>Extubated on day 6 and discharged.                                                                                    |
| Ciuca et al.(44)        | 6 years, male    | Persistent fever                     | Echo: LVEF 48%, mild pericardial effusion                                                                                                                                                                | Non-invasive ventilator support<br>Inotropic therapy<br>Dexamethasone,<br>hydroxychloroquine<br>Low-molecular weight heparin | Normalization of the LVEF within 72 hrs of ventilatory and inotropic support.                                                                           |

|                       |                  |                                     |                                                                                                                                                                                                                                                                                                           |                                                                                             |                                                                                   |
|-----------------------|------------------|-------------------------------------|-----------------------------------------------------------------------------------------------------------------------------------------------------------------------------------------------------------------------------------------------------------------------------------------------------------|---------------------------------------------------------------------------------------------|-----------------------------------------------------------------------------------|
| Gay et al.(45)        | 56 years, male   | Dyspnea and lethargy                | Troponin I 1.3 ng/mL<br>ECG: rapid AF and low voltage<br>Echo: concentric left ventricular hypertrophy and LVEF 20%, small pericardial effusion.                                                                                                                                                          | ECMO<br>Methylprednisolone<br>Tocilizumab                                                   | Patient's LVEF improved to 65% on day 7<br>Recovering in the general medical ward |
| Ozturan et al. (46)   | 25 years, male   | Chest pain, dyspnea, fever, fatigue | HR 140<br>BP 130/90<br>eCG: sinus tachycardia with ST elevation and PR depression in leads I, aVL, V5 and V6. ST depression and PR elevation in aVR.<br>Troponin: 21.471 ng/mL (normal 0-60 ng/mL)<br>Echo: diffuse left ventricular hypokinesia with LVEF 35%<br>Blood and sputum cultures were negative | Ampicillin-sulbactam<br>Clarithromycin<br>Oseltamivir<br>acetylsalicylic acid<br>metoprolol | Echo on day 8 showed LVEF = 55%                                                   |
| Caraffa et al. (47)   | 40 years, female | Atypical chest pain, fever          | Normal ECG<br>Normal troponin<br>Severe LV dysfunction                                                                                                                                                                                                                                                    | ECMO<br>Apical venting surgery<br>Methylprednisolone<br>Azathioprine                        | LVEF 48% on day 13 post-operative                                                 |
| Gauchotte et al. (48) | 69 years, male   | Fever, abdominal pain, fatigue      | Echo: LVEF 30%<br>Troponin: 8066 pg/mL<br>Creatinine kinase – MB: 2103 UI/L<br>PCI: no significant lesion/obstruction                                                                                                                                                                                     | ECMO                                                                                        | Refractory shock and multi-organ failure<br>Deceased 6 days after admission       |
| Cairns et al. (49)    | 58 years, female | Fever, diarrhea, vomiting           | BP 85/45<br>HR 91<br>Pericardial effusion                                                                                                                                                                                                                                                                 | Pericardiocentesis<br>Vasopressor support<br>IV Tazocin                                     | Discharged on day 12                                                              |
| Gioia et al. (50)     | 57 years, Female | Trouble breathing                   | BP 98/58<br>ECG: diffused ST segment elevation<br>Troponin: 64.0 ng/mL<br>PCI: non-occlusive<br>Echo: normal LVEF                                                                                                                                                                                         | Pericardiocentesis<br>Transcutaneous pacing<br>Vasopressor                                  | Patient passed away                                                               |
| Ford et al. (51)      | 53 years, Male   | Malaise, fever, cough               | HR 140<br>BP 97/55<br>ECG: wide-complex, irregular tachycardia, left bundle branch block<br>Troponin: high                                                                                                                                                                                                | Metoprolol<br>Losartan<br>Spironolactone                                                    | Patient have left middle cerebral artery stroke 3 days after discharged stable    |

|                     |                  |                                                                                 |                                                                                                                                                                                    |                                                                                                   |                                                  |
|---------------------|------------------|---------------------------------------------------------------------------------|------------------------------------------------------------------------------------------------------------------------------------------------------------------------------------|---------------------------------------------------------------------------------------------------|--------------------------------------------------|
|                     |                  |                                                                                 | BNP: 588 pg/mL<br>Echo: LVEF 15%<br>CMR: global hypokinesia, increased T2 signal, hyperemia, edema                                                                                 |                                                                                                   |                                                  |
| Tiary et al. (52)   | 30 years, Male   | Fatigue, shortness of breath, abdominal flank pain, tiredness, light-headedness | BNP 557 pg/mL<br>Troponin: 7.52 ng/mL<br>ECG: sinus rhythm                                                                                                                         | Pericardiocentesis<br>Remdesivir<br>Convalescent plasma<br>Dexamethasone<br>Empirical antibiotics | Discharged on day 27                             |
| Meel et al. (53)    | 31 years, male   | Shortness of breath<br>Chest discomfort                                         | BP: 122/76<br>HR 76<br>ECG: normal<br>Troponin: 319 ng/L<br>NT-proBNP: 143 ng/L<br>Echo: normal LVEF<br>CMR: midwall and epicardial LGE                                            | Colchicine<br>prednisolone                                                                        | Discharged at.1 week                             |
| Trpkov et al. (54)  | 62 years, female | Altered consciousness, hypoxemia, shock                                         | BP 55/32<br>HR 120<br>ECG: sinus tachycardia with diffuse anterolateral ST-elevation<br>Troponin: 4986 ng/L<br>NT-proBNP: 51,439 ng/L<br>CMR: sub-epicardial LGE<br>Echo: LVEF 24% | Anakinra IV                                                                                       | Patient recovered and finally discharged         |
| Fischer et al. (55) | 15 years, Male   | Chest pain, mild fever                                                          | BP 100/60<br>HR 75<br>ECG: diffused ST elevation without reciprocal changes<br>Troponin: 6.1 mcg/L<br>NT-proBNP 65 ng/L<br>ECG: LVEF 50%                                           | Beta blockers<br>Angiotensin-converting enzyme inhibitors                                         | Discharged from the hospital day 9 with LVEF 55% |
| Kohli et al. (56)   | 15 years, Female | Headache, vomiting, fatigue, fever                                              | BP: 70/40<br>HR: 150<br>Echo: LVEF 20%                                                                                                                                             | Milrinone<br>Epinephrine<br>IVIG                                                                  | Patient recovered                                |

|                           |                   |                                         |                                                                                                                                                                                                                                        |                                                                                                                             |                                                              |
|---------------------------|-------------------|-----------------------------------------|----------------------------------------------------------------------------------------------------------------------------------------------------------------------------------------------------------------------------------------|-----------------------------------------------------------------------------------------------------------------------------|--------------------------------------------------------------|
|                           |                   |                                         | Troponin: high<br>NT-proBNP: high                                                                                                                                                                                                      | IV methylprednisolone<br>Anakinra<br>amiodarone                                                                             |                                                              |
| Sassone et al.<br>(57)    | 38 years,<br>Male | Sudden-onset<br>oppressive chest pain   | ECG: mild ST segment elevation in the inferior leads<br>PCI: no obstruction<br>Echo: preserved LVEF with inferolateral wall<br>hypokinesis<br>Troponin: 4038 ng/L<br>CMR: subepicardial LGE                                            | N/A                                                                                                                         | Discharged on day 20                                         |
| Bemtgen et al.<br>(58)    | 18 years,<br>Male | Hyperpyrexia, chills,<br>tachycardia    | ECG: sinus tachycardia<br>Echo: LVEF 25%<br>Troponin: 341 ng/L (<14 ng/L)<br>EMB: significant infiltration of immune cells<br>especially CD68+ macrophages and CD3+ t cells<br>around small vessels (lymphohistiocytic<br>myocarditis) | Dexamethasone,<br>IVIg<br>Anakinra<br>V-A ECMO<br>Impella                                                                   | LVEF full recovery<br>Discharged 32 days after<br>admission. |
| Tseng et al.<br>(59)      | 5 years,<br>Male  | Fatigue, vomiting                       | ECG: monomorphic ventricular tachycardia<br>Troponin: 1658 ng/L (normal range 3-7 ng/L)<br>BNP: 2298 pg/mL (<101 pg/mL)<br>Echo: bilaterally reduced LVEF                                                                              | Synchronized<br>cardioversion<br>Lidocaine<br>VA-ECMO<br>IVIg<br>Methylprednisolone<br>Remdesivir<br>Milrinone<br>Enalapril | Full recovery                                                |
| Belli et al.<br>(60)      | 53 years,<br>Male | Typical symptoms of<br>COVID-19         | ECG: normal sinus rhythm<br>Troponin: 236 ng/L<br>NT-proBNP: 18,732 ng/L<br>Echo: LVEF 30%, apical ballooning and extensive<br>akinesia<br>Angiography: 30% stenosis of the left anterior<br>descending                                | N/A                                                                                                                         | Takotsubo cardiomyopathy<br>diagnosed.                       |
| Nedeljkovic<br>et al.(61) | 32 years,<br>Male | Asymptomatic COVID-<br>19 at first then | ECG: premature ventricular complexes                                                                                                                                                                                                   | Ibuprofen, bisoprolol,<br>coenzyme Q-10                                                                                     | 3 months follow-up<br>showed preserved left and              |

|                      |                |                                                             |                                                                                                                                                                                                                                                                                                                                                                                                                                                       |                                                                                                            |                                                                                                                                                              |
|----------------------|----------------|-------------------------------------------------------------|-------------------------------------------------------------------------------------------------------------------------------------------------------------------------------------------------------------------------------------------------------------------------------------------------------------------------------------------------------------------------------------------------------------------------------------------------------|------------------------------------------------------------------------------------------------------------|--------------------------------------------------------------------------------------------------------------------------------------------------------------|
|                      |                | Dyspnoea and dizziness during exercise after self-isolation | CMR: late gadolinium enhancement in the mid-lateral left ventricular wall, pericarditis present                                                                                                                                                                                                                                                                                                                                                       |                                                                                                            | right ventricular function (61% & 65% respectively). However, there was persistent LGE in the LV lateral wall.                                               |
| Singh et al.(62)     | 25 years, Male | Substernal chest pain with radiation to both arms.          | ECG: 1mm ST elevation in II, III and aVF without reciprocal changes.<br>Troponin: 14,122 ng/L<br>Echo: normal<br>Coronary angiography: normal<br>CMR: subepicardial enhancement of the basal to mid inferolateral wall and the apical lateral wall. T2 signal in the lateral wall, indicating edema, mild hypokinesia.                                                                                                                                | Lifestyle advice                                                                                           | 6-week follow-up showed resolution of the T2 signal and decreased LGE                                                                                        |
| Ishikura et al. (63) | 35 years, Male | Fever and general weakness                                  | ECG: sinus tachycardia<br>Troponin: 31,516 pg/mL (<30 pg/mL)<br>NT-proBNP: 3905 pg/mL (<18.4 pg/mL)<br>Echo: LVEF 7.4%<br>Coronary angiography: normal<br>EMB: diffuse lymphocytic infiltrate, SARS-CoV-2 positive in the myocardium via RT-PCR                                                                                                                                                                                                       | IABP<br>Veno-arterial ECMO<br>IVIG<br>Steroids<br>Continuous renal replacement therapy<br>Antiviral agents | 2 weeks after admission patient recovered and was weaned of ECMO & IABP                                                                                      |
| Gaudriot et al. (64) | 38 years, Male | Chest pain, vomiting                                        | ECG: sinus tachycardia with incomplete right bundle branch block<br>Troponin: 1600 pg/mL (<14 pg/mL)<br>NT-proBNP: 10,500 pg/mL (<300 pg/mL)<br>Echo: biventricular infiltrative myocardial hypertrophy, associated with a circumferential non-compressive pericardial effusion and restrictive mitral valve inflow profile, worsening oedema and increasing wall thickness<br>CMR: T2 signal with increased myocardial thickening, subepicardial LGE | Veno-arterial ECMO<br>IABP<br>Heart transplantation                                                        | Explanted heart shows pericarditis and myocarditis with large myocardial necrosis, suppurated lesions, lymphocytic infiltration (no SARS-CoV-2 RNA detected) |
| Meyer et al. (65)    | 81 years, Male | Worsening dyspnea, fever                                    | ECG: normal sinus rhythm, ST-T changes secondary to left ventricular hypertrophy.                                                                                                                                                                                                                                                                                                                                                                     | Amoxicillin-clavulanic acid<br>Ceftriaxone                                                                 | 6-month follow-up showed reduced LVEF 39% on echo                                                                                                            |



|                     |                  |                                              |                                                                                                                                                                                                                                                                                          |                                                                                                           |                                                                                                                                                                                                                                                         |
|---------------------|------------------|----------------------------------------------|------------------------------------------------------------------------------------------------------------------------------------------------------------------------------------------------------------------------------------------------------------------------------------------|-----------------------------------------------------------------------------------------------------------|---------------------------------------------------------------------------------------------------------------------------------------------------------------------------------------------------------------------------------------------------------|
|                     |                  |                                              | Troponin: 11.9 ng/L<br>BNP: 46 ng/L (<100 ng/L)<br>Echo: LVEF 59% (1 month post admission for COVID-19)                                                                                                                                                                                  | Prednisolone<br><br>For myocarditis →<br>bisoprolol, ramipril.                                            | due to mild hypokinesia and severe inferior wall hypokinesia<br>CMR showed infero-basal LV wall edema, subepicardial and mid-wall LGE in the basal inferior, basal inferolateral and anterior LV walls.<br>ECG showed inverted T waves on lateral leads |
| Mentor et al. (66)  | 47 years, Female | Flu-like symptoms, unconsciousness and apnea | ECG: ST depression across all leads (except aVR)<br>Coronary angiogram: Normal<br>Echo: reduced LVEF 30%<br>Troponin: 272 ng/L<br>BNP > 70,000 ng/L                                                                                                                                      | Adrenaline/noradrenaline<br>Prophylactic antibiotics<br>2 x CPR                                           | RIP 48 hours after admission<br>Autopsy of the heart: mild diffuse necrotizing myocarditis with positive SARS-CoV-2 in the heart tissue by RT-PCR                                                                                                       |
| Gaine et al.(67)    | 58 years, Male   | Palpitations, progressive dyspnea            | ECG: atrial fibrillation, no ST-T abnormalities<br>Troponin: 25 ng/L (<14 ng/L)<br>NT-proBNP: 3428 pg/mL (<400 pg/mL)<br>Echo: LVEF 20%, mitral regurgitation<br>Coronary angiography: no obstructive disease<br>CMR: biventricular dysfunction, edema and reduced myocardial T1 signal. | Intravenous diuretics<br>Rate-control<br>antiarrhythmics<br>ACE inhibitor<br>Mineralocorticoid antagonist | Patient remained afebrile throughout admission and discharged                                                                                                                                                                                           |
| Ghafoor et al. (68) | 54 years, Female | Dyspnea, nausea, and vomiting                | ECG: 1 mm ST elevation in leads II, III and aVF<br>Right and left heart catheterization: normal epicardial coronary arteries but reduced ventricular ejection fraction (10%)<br>Echo: global hypokinesia and reduced ejection fraction                                                   | CPR<br>Inotropic agents<br>Vasopressor<br>Veno-arterial ECMO                                              | Patient family went for palliative care                                                                                                                                                                                                                 |
| Ziaie et al. (69)   | 39 years, Female | Chest pain, orthopnea, cough                 | <i>Initial admission due to COVID-19 pneumonia found:</i><br>NT-proBNP: 23,000 ng/L                                                                                                                                                                                                      | Heparin<br>Beta blocker                                                                                   | Eosinophilic syndrome with myocarditis post-COVID-19                                                                                                                                                                                                    |

|                     |                  |                                                                                                |                                                                                                                                                                                                                                                                                                                    |                                                                                      |                                                                                                                                                                             |
|---------------------|------------------|------------------------------------------------------------------------------------------------|--------------------------------------------------------------------------------------------------------------------------------------------------------------------------------------------------------------------------------------------------------------------------------------------------------------------|--------------------------------------------------------------------------------------|-----------------------------------------------------------------------------------------------------------------------------------------------------------------------------|
|                     |                  |                                                                                                | <p>Echo: LVEF 48% with apical LV clot</p> <p><i>1 month after discharged</i></p> <p>LVEF = 35% with right ventricular enlargement and dysfunction and restrictive diastolic pattern and mild pericardial effusion.</p> <p>CMR showed myocardial edema and hyperemia. Hypereosinophilic syndrome was confirmed.</p> | <p>Angiotensin converting enzyme inhibitor</p> <p>Spironolactone</p> <p>Warfarin</p> |                                                                                                                                                                             |
| Martinez et al.(70) | 64 years, Male   | Severe chest pain 3 weeks after the first positive test for SARS-CoV-2                         | <p>ECG: sinus tachycardia, no ST-T changes</p> <p>Troponin: 548.3 pg/mL (&lt;34.2 pg/mL)</p> <p>Echo: LVEF 56% no wall motion abnormalities</p>                                                                                                                                                                    | <p>Beta blockers</p> <p>Prednisolone</p>                                             | Query multisystem inflammatory syndrome since also found reactive hepatitis and subacute thyroiditis after SARS-CoV-2. Discharged on Day 3, now recovered and asymptomatic. |
| Boylan et al.(71)   | 61 years, Male   | Cardiac injury detected during routine monitoring 5 weeks after tested positive for SARS-CoV-2 | <p>ECG: sinus rhythm</p> <p>Troponin: 6142 ng/L</p> <p>NT-proBNP: 2180 pg/mL</p> <p>Echo: normal LVEF</p> <p>Coronary angiography: normal</p>                                                                                                                                                                      | <p>Methylprednisolone</p> <p>Intubation for hypoxemia</p>                            | <p>3 months post ICU discharge</p> <p>CMR: LGE found in mid-wall and subepicardial aspect of the basal segments of the septum.</p>                                          |
| Roest et al. (72)   | 50 years, Male   | Acute symptoms of cardiac decompensation                                                       | <p>NT-proBNP 212 pm/L</p> <p>Troponin: 55 ng/L</p> <p>Echo: biventricular failure and congestion</p> <p>EMB: subendocardial fibrosis</p> <p>CMR: extensive subepicardial and midwall LGE</p>                                                                                                                       | Implantable cardioverter-defibrillator                                               | Partial recovery of LVEF to 46% 2 months after discharge                                                                                                                    |
| Das (73)            | 16 years, Female | Dyspnea and fatigue                                                                            | <p>ECG: sinus tachycardia with chamber hypertrophies</p> <p>Troponin &lt;0.01 ng/mL (&lt;0.03 ng/mL)</p> <p>BNP 53 pg/mL (&lt;100 pg/mL)</p> <p>Echo: normal function</p> <p>CMR: patchy myocardial edema without any fibrosis or scarring.</p>                                                                    | <p>Symptomatic therapy</p> <p>Lifestyle advice</p>                                   | Discharged home after 1 day hospitalization during which her Holter did not record any arrhythmias.                                                                         |

|                          |                |                                                                                             |                                                                                                                                                                                                                                                                                                                                                                                                                                                                                                                   |                                                                                                                       |                                                                              |
|--------------------------|----------------|---------------------------------------------------------------------------------------------|-------------------------------------------------------------------------------------------------------------------------------------------------------------------------------------------------------------------------------------------------------------------------------------------------------------------------------------------------------------------------------------------------------------------------------------------------------------------------------------------------------------------|-----------------------------------------------------------------------------------------------------------------------|------------------------------------------------------------------------------|
| Ghugre et al. (74)       | 62 years, Male | Mild reduction in exercise tolerance 2 weeks after tested positive for SARS-CoV-2 infection | ECG: normal sinus rhythm, no ST-T changes<br>Troponin: 12 ng/L (<15 ng/L)<br>CMR: normal biventricular function, midwall and subepicardial LGE in the basal inferolateral wall.                                                                                                                                                                                                                                                                                                                                   | N/A                                                                                                                   | Patient continued to have cardiac symptoms at the time of reporting          |
| Perez-Acosta et al. (75) | 61 years, Male | Progressive dyspnea                                                                         | ECG: sinus rhythm with generalized concave ST elevation.<br>Troponin: reported high<br>Echo: mild to moderate pericardial effusion with adequate LVEF                                                                                                                                                                                                                                                                                                                                                             | Mechanical ventilation analgesia                                                                                      | N/A                                                                          |
| Taouihar et al.(76)      | 51 years       | Epigastric pain                                                                             | ECG: sinus tachycardia, ST elevation in V1, V2 with pathological Q waves, poor R wave progression and T wave inversion in II, III and aVF.<br>Echo: akinesia of the tip of the anteroseptal and inferior wall of LV and severe hypokinesia of the inferior wall, LVEF = 40%<br>Troponin 20.000 ng/L (1000x normal)<br>Coronary angiography: non-occlusive coronary arteries<br>CMR: focal hypertrophy of the anteroseptal and inferior segment of the LV and anteroinferior RV. T2 signal in the aforesaid areas. | Clopidogrel<br>Aspirin<br>ACE inhibitor<br>Bisoprolol<br>Dexamethasone<br>Enoxaparin<br>Vitamin C, zinc, azithromycin | Troponin declined after treatment and patient discharged on day 7            |
| Berg et al. (77)         | 66 years, Male | Dyspnea and fatigue, patient received orthotropic heart transplant in 2013                  | ECG: diffused T wave inversions<br>Echo: LVEF 37%<br>EMB: subendothelial fibrosis and Quilty lesion but no evievidence of acute cellular rejection or antibody mediated rejection.                                                                                                                                                                                                                                                                                                                                | Methylprednisolone                                                                                                    | Day 3 echo showed LVEF of 66% and grossly normal right ventricular function. |

AF = Atrial Fibrillation, ALS = Advanced Life Support, BiPAP = Bi-level Positive Airway Pressure, BP = Blood Pressure, CMR = Cardiovascular Magnetic Resonance, CPAP = Continuous Positive Airway Pressure, CPR = Cardiopulmonary Resuscitation, CT = Computerized Tomography, DIC = Disseminated Intravascular Coagulation, ECG = Electrocardiogram, Echo = Echocardiogram, ECMO = Extracorporeal Membrane Oxygenation, EMB = Endomyocardial Biopsy, GLS = Global Longitudinal Strain, HR = Heart Rate, IVIG = Intravenous Immunoglobulin , LGE = Late Gadolinium Enhancement, LV = Left Ventricular, LVAD = Left Ventricular Assist Device, LVEF = Left Ventricular Ejection Fraction, LVH = Left Ventricular Hypertrophy, NT-proBNP = N-terminal pro-B-type Natriuretic Peptide, RR = Respiratory Rate, RT-PCR = Real Time-Polymerase Chain Reaction



## 1.2. Reports on case series of patients with COVID-19-related myocarditis/myocardial injury

| Publication           | Patients                                                                                                                   | Cardiac MRI                                                                                                                                                        | EMB | Autopsy                                                                                                            | Complications                                                                                                         |
|-----------------------|----------------------------------------------------------------------------------------------------------------------------|--------------------------------------------------------------------------------------------------------------------------------------------------------------------|-----|--------------------------------------------------------------------------------------------------------------------|-----------------------------------------------------------------------------------------------------------------------|
| Kogan et al. (58)     | 5 patients, 2 females                                                                                                      | N/A                                                                                                                                                                | N/A | Anti-CD3 antibody positive<br>Increased TLR-4 expression<br>Lymphocytic myocarditis satisfying the Dallas criteria | None was suspected to have myocarditis at the time of death<br>Microvascular thrombosis was found in all cases.       |
| Ng et al.(59)         | 16 patients, 7 females.<br>Median age 68 years.<br>15 patients had mild or moderate COVID-19 (WHO severity classification) | 3 patients had non-ischemic LGE with elevated global T2 mapping values fulfilling Lake-Louise criteria (CMR performed at a median length of 56 days post-recovery) | N/A | N/A                                                                                                                | A proportion of patients who recovered from COVID-19 showed subclinical ongoing or healed myocarditis.                |
| Bajaj et al. (60)     | 9 patients (7 males, 2 females)<br>Median age 36                                                                           | All had CMR at a mean of 11 days following admission<br>LGE seen in 6/9, increased T1 signal in 7/7, increased T2 signal in 6/9                                    | N/A | N/A                                                                                                                | Multisystem inflammatory syndrome in adults (MIS-A) causing cardiogenic shock                                         |
| Maurus et al. (81)    | 18 patients                                                                                                                | 6/18 had myocarditis satisfying the Lake-Louise criteria                                                                                                           | N/A | N/A                                                                                                                | N/A<br>18 patients were selected based on SARS-CoV-2 +ve and raised troponin.                                         |
| Daniels et al. (82)   | 1597 athletes                                                                                                              | 37/1597 were diagnosed with myocarditis based on MRI                                                                                                               | N/A | N/A                                                                                                                | Follow-up in 27 of myocarditis patients revealed total resolution of T2 in all and late gadolinium enhancement in 11. |
| Starekova et al. (83) | 145 patients (108 male, 37 female) recovering from COVID-19                                                                | 2/145 diagnosed with myocarditis based on CMR<br>Both patients had nonischemic LGE and T2 weighted signal abnormalities                                            | N/A | N/A                                                                                                                | Prevalence of myocarditis is low (1.4%) among student athletes recovering from COVID-19                               |

|                       |                                                                                                                                          |                                                                                                                                                                                                                                                                                               |     |                                                                                                            |                                                                                                                                                                          |
|-----------------------|------------------------------------------------------------------------------------------------------------------------------------------|-----------------------------------------------------------------------------------------------------------------------------------------------------------------------------------------------------------------------------------------------------------------------------------------------|-----|------------------------------------------------------------------------------------------------------------|--------------------------------------------------------------------------------------------------------------------------------------------------------------------------|
| Dal Ferro et al. (84) | 40 deceased patients with severe SARS-CoV-2                                                                                              | N/A                                                                                                                                                                                                                                                                                           | N/A | 1/40 patient was found to have histological evidence of myocarditis but no SARS-CoV-2 RNA found via RT-PCR | Myocardial damage found and correlate with the severity of COVID-19 and pre-existing comorbidities.                                                                      |
| Garg et al. (85)      | 2 COVID-19 patients with large LV thrombi and multisystem thrombotic events                                                              | N/A                                                                                                                                                                                                                                                                                           | N/A | N/A                                                                                                        | Both patients had large mural thrombi and multisystem thrombotic events, the authors attributed this to cytokine storm secondary to COVID-19                             |
| Galea et al. (86)     | 27 COVID-19 patients with suspected cardiac involvement enrolled to study correlations between CMR findings and cardiac biomarkers.      | 20 patients with abnormal CMR <ul style="list-style-type: none"> <li>- 11 with increased T1 signals</li> <li>- 14 with myocardial T2</li> <li>- 12 with LGE</li> <li>- 9 patients met the CMR criteria for myocarditis</li> <li>- 11 patients had MI</li> <li>- 2 had pericarditis</li> </ul> | N/A | N/A                                                                                                        | Abnormal T2 was the most commonly observed CMR finding in COVID-19 patients with cardiac complications. This shows edematous changes in the active phase of the disease. |
| Malek et al.(87)      | 26 consecutive athletes (21 females, 5 males) with mild or asymptomatic COVID-19. CMR was performed a median of 32 days after diagnosis. | CMR abnormalities were found in 5 (19%) including 4 who had signs of myocardial edema and 1 with non-ischemic LGE with pericardial effusion.                                                                                                                                                  | N/A | N/A                                                                                                        | Acute myocarditis was not observed among participants but a minority (19%) showed some CMR abnormal findings.                                                            |

|                      |                                                                                              |                                                                                                                                                                                   |     |     |                                                                                                                                                                                                                                         |
|----------------------|----------------------------------------------------------------------------------------------|-----------------------------------------------------------------------------------------------------------------------------------------------------------------------------------|-----|-----|-----------------------------------------------------------------------------------------------------------------------------------------------------------------------------------------------------------------------------------------|
| Kotecha et al. (88)  | 148 recovered COVID-19 patients who had raised troponin levels during their initial illness. | CMR performed on a median of 68 days after COVID-19 diagnosis. LGE was found in 80/148 among these 39 had myocarditis-like scars, 32 had ischemic scars and 9 had dual pathology. | N/A | N/A | Myocarditis-like injury can be observed in recovered COVID-19 patients with raised cardiac enzymes. These patients often had minimal functional consequences of myocarditis despite a proportion showing signs of ongoing inflammation. |
| Joy et al. (89)      | 74 recovered COVID-19 patients vs 75 matched seronegative subjects.                          | CMR: LGE and T1, T2 abnormalities were found in 13, 6 and 9 individuals respectively, equally distributed between case and control cohorts.                                       | N/A | N/A | Cardiovascular abnormalities are no more common in seropositive versus seronegative subjects who are otherwise healthy.                                                                                                                 |
| Peterson et al. (90) | 67 patients who were admitted due to myocarditis pre and during the pandemic.                | N/A                                                                                                                                                                               | N/A | N/A | 45% of the patients admitted with myocarditis during the pandemic tested positive for SARS-CoV-2. Pre-pandemic incidence of myocarditis is 1.5/month while the pandemic incidence of myocarditis is 3.7/month.                          |

### Abbreviations

AF = Atrial Fibrillation, ALS = Advanced Life Support, BiPAP = Bi-level Positive Airway Pressure, BP = Blood Pressure, CMR = Cardiovascular Magnetic Resonance, CPAP = Continuous Positive Airway Pressure, CPR = Cardiopulmonary Resuscitation, CT = Computerized Tomography, DIC = Disseminated Intravascular Coagulation, ECG = Electrocardiogram, Echo = Echocardiogram, ECMO = Extracorporeal Membrane Oxygenation, EMB = Endomyocardial Biopsy, GLS = Global Longitudinal Strain, HR = Heart Rate, IVIG = Intravenous Immunoglobulin, LGE = Late Gadolinium Enhancement, LV = Left Ventricular, LVAD = Left Ventricular Assist Device, LVEF = Left Ventricular Ejection Fraction, LVH = Left Ventricular Hypertrophy, NT-proBNP = N-terminal pro-B-type Natriuretic Peptide, RR = Respiratory Rate, RT-PCR = Real Time-Polymerase Chain Reaction

## Supplementary table 2

### Empirical treatments for SARS-CoV-2-related myocarditis

| Treatments                                                                                  |                                                                                                                                                                                                                                                  |                                                                               |
|---------------------------------------------------------------------------------------------|--------------------------------------------------------------------------------------------------------------------------------------------------------------------------------------------------------------------------------------------------|-------------------------------------------------------------------------------|
| Inotropes and vasodilators                                                                  | Indication(s)                                                                                                                                                                                                                                    | References                                                                    |
| Dobutamine, norepinephrine, epinephrine, isoprenaline, milrinone, levosimendan, vasopressin | <ul style="list-style-type: none"> <li>- Hypotension</li> <li>- Reduced LVEF</li> <li>- Cardiogenic shock</li> </ul> <p><b>NB:</b> Almost all patients have deranged cardiobiomarkers (troponin, BNP, NT-proBNP) and/or abnormal ECG changes</p> | (9, 13, 14, 21, 22, 24, 26, 28, 30–32, 34, 36, 38–40, 42, 49, 50, 56, 91, 92) |
| Mechanical circulatory support                                                              |                                                                                                                                                                                                                                                  |                                                                               |
| Percutaneous heart pump (Impella®)                                                          | <ul style="list-style-type: none"> <li>- Cardiogenic shock</li> </ul> <p><b>NB:</b> Impella reported successful as a sole mechanical circulatory support when poorest LVEF &gt; 26-30%</p>                                                       | (24, 28)                                                                      |
| Extracorporeal membrane oxygenation (ECMO)                                                  | <ul style="list-style-type: none"> <li>- Cardiogenic shock with severely reduced LVEF</li> </ul>                                                                                                                                                 | (4, 9, 24, 43, 45, 47, 48, 93)                                                |
| Non-steroidal anti-inflammatory agents                                                      |                                                                                                                                                                                                                                                  |                                                                               |
| Ibuprofen                                                                                   | <ul style="list-style-type: none"> <li>- Symptomatic relief of chest pain and other associated pain</li> </ul>                                                                                                                                   | (7, 27)                                                                       |



|                                                                                        |                                                                                                                                                                                                              |                                                                                  |
|----------------------------------------------------------------------------------------|--------------------------------------------------------------------------------------------------------------------------------------------------------------------------------------------------------------|----------------------------------------------------------------------------------|
|                                                                                        |                                                                                                                                                                                                              |                                                                                  |
| Indomethacin                                                                           | - Acute myopericarditis                                                                                                                                                                                      | (34)                                                                             |
| Colchicine                                                                             | - Acute myopericarditis<br>- Recurrent myopericarditis                                                                                                                                                       | (10, 14,<br>34, 53)                                                              |
| Immunomodulatory drugs                                                                 |                                                                                                                                                                                                              |                                                                                  |
| Corticosteroids (e.g. dexamethasone, methylprednisolone, prednisolone, hydrocortisone) | - patients with hypoxia requiring supplemental oxygen/unable to tolerate supplemental oxygen<br>- Initial treatment for acute myopericarditis<br>- Clinical symptoms of systemic inflammation/cytokine storm | (4, 5, 14,<br>22, 28, 31,<br>33, 34, 38,<br>40, 44, 45,<br>52, 53, 56,<br>91–93) |
| Intravenous immunoglobulin (IVIG)                                                      | - Severe myocarditis with symptoms in keeping with systemic inflammation/cytokine storm<br>- In some cases, IVIG is used when corticosteroid therapy is contraindicated i.e. severe immunosuppression.       | (4, 13, 22,<br>30, 31, 36,<br>38, 43, 56,<br>92, 93)                             |
| Tocilizumab                                                                            | - Severe hypoxia requiring ventilatory support<br>- Possible role in the management of myocarditis                                                                                                           | (30, 42,<br>45)                                                                  |
| Anakinra                                                                               | - Fulminant myocarditis<br>- Recurrent/persistent ventricular dysfunction in the context of myocarditis                                                                                                      | (54, 56)                                                                         |
| Diuretics                                                                              |                                                                                                                                                                                                              |                                                                                  |
| Furosemide, spironolactone                                                             | - Oedema, fluid overload                                                                                                                                                                                     | (12, 21,<br>39, 51, 92)                                                          |

|                                              |                                                  |                                          |
|----------------------------------------------|--------------------------------------------------|------------------------------------------|
| Other treatments                             |                                                  |                                          |
| Pericardiocentesis                           | - Cardiac tamponade secondary to myopericarditis | (4, 32, 49, 50, 52)                      |
| Antivirals (remdesivir, ritonavir/lopinavir) | - As per local protocol for COVID-19 management  | (4, 23, 30, 41, 51, 91–93)               |
| Hydroxychloroquine<br>Chloroquine            | - Early empirical treatment for COVID-19         | (10, 12, 14, 23, 27, 31, 37, 44, 91, 92) |

#### Abbreviations

ECG = Electrocardiogram, ECMO = Extracorporeal Membrane Oxygenation, IVIG = Intravenous Immunoglobulin, LV = Left Ventricular, LVEF = Left Ventricular Ejection Fraction, NT-proBNP = N-terminal pro-B-type Natriuretic Peptide,

## References

1. Kim I-C, Kim JY, Kim HA, Han S. COVID-19-related myocarditis in a 21-year-old female patient. *European Heart Journal* 2020;41:1859–1859. Available at: <https://academic.oup.com/eurheartj/article/41/19/1859/5819437>. Accessed March 14, 2021.
2. Paul JF, Charles P, Richaud C, Caussin C, Diakov C. Myocarditis revealing COVID-19 infection in a young patient. *European Heart Journal Cardiovascular Imaging* 2020;21:776. Available at: </pmc/articles/PMC7197601/>. Accessed March 14, 2021.
3. Zeng JH, Liu YX, Yuan J, et al. First case of COVID-19 complicated with fulminant myocarditis: a case report and insights. *Infection* 2020;48:773–777. Available at: </pmc/articles/PMC7146072/>. Accessed March 14, 2021.
4. Irabien-Ortiz Á, Carreras-Mora J, Sionis A, Pàmies J, Montiel J, Tauron M. Fulminant myocarditis due to COVID-19. *Revista Española de Cardiología (English Edition)* 2020;73:503–504. Available at: <https://pubmed.ncbi.nlm.nih.gov/32345547/>. Accessed March 14, 2021.
5. Doyen D, Mocerri P, Ducreux D, Dellamonica J. Myocarditis in a patient with COVID-19: a cause of raised troponin and ECG changes. *The Lancet* 2020;395:1516. Available at: </pmc/articles/PMC7180035/>. Accessed March 14, 2021.
6. Inciardi RM, Lupi L, Zaccone G, et al. Cardiac Involvement in a Patient with Coronavirus Disease 2019 (COVID-19). *JAMA Cardiology* 2020;5:819–824. Available at: <https://pubmed.ncbi.nlm.nih.gov/32219357/>. Accessed March 14, 2021.
7. Trogen B, Gonzalez FJ, Shust GF. COVID-19-Associated Myocarditis in an Adolescent. *Pediatric Infectious Disease Journal* 2020;39:e204–e205. Available at: <https://journals.lww.com/10.1097/INF.0000000000002788>. Accessed March 14, 2021.

8. Sardari A, Tabarsi P, Borhany H, Mohiaddin R, Houshmand G. Myocarditis detected after COVID-19 recovery. *European heart journal cardiovascular Imaging* 2021;22:131–132. Available at: [/pmc/articles/PMC7574602/](#). Accessed March 14, 2021.
9. Kesici S, Aykan HH, Orhan D, Bayrakci B. Fulminant COVID-19-related myocarditis in an infant. *European Heart Journal* 2020;41:3021. Available at: [/pmc/articles/PMC7314020/](#). Accessed March 14, 2021.
10. Beşler MS, Arslan H. Acute myocarditis associated with COVID-19 infection. *American Journal of Emergency Medicine* 2020;38:2489.e1-2489.e2. Available at: [/pmc/articles/PMC7265842/](#). Accessed March 14, 2021.
11. Chiu JS, Lahoud-Rahme M, Schaffer D, Cohen A, Samuels-Kalow M. Kawasaki Disease Features and Myocarditis in a Patient with COVID-19. *Pediatric Cardiology* 2020;41:1526–1528. Available at: <https://pubmed.ncbi.nlm.nih.gov/32542549/>. Accessed March 14, 2021.
12. Oleszak F, Maryniak A, Botti E, et al. Myocarditis Associated With COVID-19. *American Journal of Medical Case Reports* 2020;8:498–502. Available at: [/pmc/articles/PMC7575206/](#). Accessed March 15, 2021.
13. Lara D, Young T, Toro K del, et al. Acute fulminant myocarditis in a pediatric patient with covid-19 infection. *Pediatrics* 2020;146. Available at: <https://doi.org/10.1542/peds.2020-1509>. Accessed March 15, 2021.
14. Coyle J, Igbinomwanhia E, Sanchez-Nadales A, Danciu S, Chu C, Shah N. A Recovered Case of COVID-19 Myocarditis and ARDS Treated With Corticosteroids, Tocilizumab, and Experimental AT-001. *JACC: Case Reports* 2020;2:1331–1336. Available at: <https://pubmed.ncbi.nlm.nih.gov/32368755/>. Accessed March 15, 2021.
15. Rehman M, Gondal A, Rehman NU. Atypical Manifestation of COVID-19-Induced Myocarditis. *Cureus* 2020;12. Available at: [/pmc/articles/PMC7305571/](#). Accessed March 15, 2021.

16. Yokoo P, Fonseca EKUN, Sasdelli Neto R, et al. COVID-19 myocarditis: a case report. *Einstein (Sao Paulo, Brazil)* 2020;18:eRC5876. Available at: [/pmc/articles/PMC7575039/](#). Accessed March 15, 2021.
17. Bernal-Torres W, Herrera-Escandón Á, Hurtado-Rivera M, et al. COVID-19 fulminant myocarditis: A case report. *European Heart Journal - Case Reports* 2020;4. Available at: <https://pubmed.ncbi.nlm.nih.gov/33089053/>. Accessed March 15, 2021.
18. Bonnet M, Craighero F, Harbaoui B. Acute Myocarditis With Ventricular Noncompaction in a COVID-19 Patient. *JACC: Heart Failure* 2020;8:599–600. Available at: <https://covid19.elsevierpure.com/en/publications/acute-myocarditis-with-ventricular-noncompaction-in-a-covid-19-pa>. Accessed March 15, 2021.
19. Auer J, Neuhierl F, Hetzmann Z. Covid-19-related fatal myocarditis in a 42-year-old female patient. *Cardiology Journal* 2020;27:642–643. Available at: [www.cardiologyjournal.org](http://www.cardiologyjournal.org). Accessed March 15, 2021.
20. Volis I, Livneh I, Hussein K, Raz-Pasteur A. COVID-19-Associated Suspected Myocarditis as the Etiology for Recurrent and Protracted Fever in an Otherwise Healthy Adult. *American Journal of the Medical Sciences* 2021. Available at: <https://pubmed.ncbi.nlm.nih.gov/33546881/>. Accessed March 17, 2021.
21. Dahl EH, Mosevoll KA, Cramariuc D, Vedeler CA, Blomberg B. COVID-19 myocarditis and postinfection Bell's palsy. *BMJ Case Reports* 2021;14:e240095. Available at: <https://casereports.bmj.com/lookup/doi/10.1136/bcr-2020-240095>. Accessed March 17, 2021.
22. Hu H, Ma F, Wei X, Fang Y. Coronavirus fulminant myocarditis treated with glucocorticoid and human immunoglobulin. *European Heart Journal* 2021;42:206. Available at: [/pmc/articles/PMC7184348/](#). Accessed March 21, 2021.
23. Sala S, Peretto G, Gramegna M, et al. Acute myocarditis presenting as a reverse Tako-Tsubo syndrome in a patient with SARS-CoV-2 respiratory infection. *European Heart Journal* 2020;41:1861–1862. Available at: <https://pubmed.ncbi.nlm.nih.gov/32267502/>. Accessed April 26, 2021.

24. Papageorgiou J-M, Almroth H, Törnudd M, van der Wal H, Varelogianni G, Lawesson SS. Fulminant myocarditis in a COVID-19 positive patient treated with mechanical circulatory support – a case report. *European Heart Journal - Case Reports* 2021;5. Available at: [/pmc/articles/PMC7799209/](#). Accessed March 21, 2021.
25. Spano G, Fischer K, Maillat C, Vicario G, Huber AT, Gräni C. Delayed isolated peri-myocarditis in a Covid-19 patient with respiratory symptoms but without lung involvement. *International Journal of Cardiovascular Imaging* 2020;36:2279–2280. Available at: [/pmc/articles/PMC7385195/](#). Accessed March 21, 2021.
26. Ashok V, Loke WI, Dinov B, et al. Case report: High-grade atrioventricular block in suspected COVID-19 myocarditis. *European Heart Journal - Case Reports* 2020;4:1. Available at: [/pmc/articles/PMC7499545/](#). Accessed March 21, 2021.
27. Gnecci M, Moretti F, Bassi EM, et al. Myocarditis in a 16-year-old boy positive for SARS-CoV-2. *The Lancet* 2020;395:e116. Available at: [/pmc/articles/PMC7316465/](#). Accessed March 21, 2021.
28. Richard I, Robinson B, Dawson A, Aya A, Ali R. An Atypical Presentation of Fulminant Myocarditis Secondary to COVID-19 Infection. *Cureus* 2020;12. Available at: [/pmc/articles/PMC7425826/](#). Accessed March 21, 2021.
29. Craver R, Huber S, Sandomirsky M, McKenna D, Schieffelin J, Finger L. Fatal Eosinophilic Myocarditis in a Healthy 17-Year-Old Male with Severe Acute Respiratory Syndrome Coronavirus 2 (SARS-CoV-2c). *Fetal and Pediatric Pathology* 2020;1–6. Available at: [/pmc/articles/PMC7232882/](#). Accessed March 21, 2021.
30. Khalid Y, Dasu N, Dasu K. A case of novel coronavirus (COVID-19)-induced viral myocarditis mimicking a Takotsubo cardiomyopathy. *HeartRhythm Case Reports* 2020;6:473–476. Available at: [/pmc/articles/PMC7424304/](#). Accessed March 21, 2021.

31. Khatri A, Wallach F. Coronavirus disease 2019 (Covid-19) presenting as purulent fulminant myopericarditis and cardiac tamponade: A case report and literature review. *Heart and Lung* 2020;49:858–863. Available at: </pmc/articles/PMC7280096/>. Accessed March 21, 2021.
32. Dalen H, Holte E, Guldal AU, et al. Acute perimyocarditis with cardiac tamponade in COVID-19 infection without respiratory disease. *BMJ Case Reports* 2020;13. Available at: </pmc/articles/PMC7440216/>. Accessed March 21, 2021.
33. Fadiran O. An Atypical Case of COVID-19 Induced Pancytopenia, Rhabdomyolysis and Myocarditis. *Cureus* 2021;13. Available at: <https://pubmed.ncbi.nlm.nih.gov/33552773/>. Accessed March 21, 2021.
34. Hussain H, Fadel A, Alwaeli H, Guardiola V. Coronavirus (COVID-19) Fulminant Myopericarditis and Acute Respiratory Distress Syndrome (ARDS) in a Middle-Aged Male Patient. *Cureus* 2020;12. Available at: </pmc/articles/PMC7320646/>. Accessed March 21, 2021.
35. Sheikh AB, Javed N, Sheikh AAE, Upadhyay S, Shekhar R. Diabetes Insipidus and Concomitant Myocarditis: A Late Sequelae of COVID-19 Infection. *Journal of Investigative Medicine High Impact Case Reports* 2021;9:232470962199995. Available at: <http://journals.sagepub.com/doi/10.1177/2324709621999954>. Accessed March 21, 2021.
36. Beaudry JT, Dietrick B, Lammert DB, et al. Fatal SARS-CoV-2 Inflammatory Syndrome and Myocarditis in an Adolescent: A Case Report. *Pediatric Infectious Disease Journal* 2021;40:e72–e76. Available at: <https://journals.lww.com/10.1097/INF.0000000000002978>. Accessed March 22, 2021.
37. Garot J, Amour J, Pezel T, et al. SARS-CoV-2 Fulminant Myocarditis. *JACC: Case Reports* 2020;2:1342–1346. Available at: <https://linkinghub.elsevier.com/retrieve/pii/S2666084920306288>. Accessed March 22, 2021.
38. Milla-Godoy GC, Park R, Jiang W, Hartkopf MW, Treadwell T. Fulminant COVID-19-Associated Myocarditis in an Otherwise Healthy Female. *Cureus* 2021;13. Available at:

<https://www.cureus.com/articles/49621-fulminant-covid-19-associated-myocarditis-in-an-otherwise-healthy-female>. Accessed March 22, 2021.

39. Lozano Gómez H, Pascual Bielsa A, Arche Banzo MJ. Fulminant myocarditis and cardiogenic shock during SARS-CoV-2 infection. *Medicina Clínica (English Edition)* 2020;155:463–464. Available at: </pmc/articles/PMC7603987/>. Accessed March 22, 2021.

40. Naneishvili T, Khalil A, O'Leary R, Prasad N. Fulminant myocarditis as an early presentation of SARS-CoV-2. *BMJ case reports* 2020;13:237553. Available at: </pmc/articles/PMC7490957/>. Accessed March 22, 2021.

41. Cuomo G, Menozzi M, Carli F, et al. Acute myocarditis as the main clinical manifestation of SARS-CoV 2 infection: A case report. *Infectious Disease Reports* 2020;12. Available at: </pmc/articles/PMC7459753/>. Accessed March 22, 2021.

42. Chitturi KR, Thacker S, Al-Saadi MA, Kassi M. Successful treatment of acute heart failure in COVID-19-induced cytokine storm with tocilizumab: a case report Savarese G, Ferrannini G, Stolfo D, Fielder Camm C, Thomson R, editors. *European Heart Journal - Case Reports* 2020;4:1–6. Available at: <https://academic.oup.com/ehjcr/article/4/FI1/1/5873148>. Accessed March 22, 2021.

43. Tseng YS, Herron C, Garcia R, Cashen K. Sustained ventricular tachycardia in a paediatric patient with acute COVID-19 myocarditis. *Cardiology in the Young* 2021;1–3. Available at: <https://www.cambridge.org/core/terms.https://doi.org/10.1017/S1047951121000792> Downloaded from <https://www.cambridge.org/core>. Accessed March 22, 2021.

44. Ciuca C, Fabi M, di Luca D, et al. Myocarditis and coronary aneurysms in a child with acute respiratory syndrome coronavirus 2. *ESC Heart Failure* 2021;8:761–765. Available at: </pmc/articles/PMC7835580/>. Accessed March 22, 2021.



45. Gay HC, Sinha A, Michel E, et al. Fulminant myocarditis in a patient with coronavirus disease 2019 and rapid myocardial recovery following treatment. *ESC Heart Failure* 2020;7:4367–4370. Available at: [/pmc/articles/PMC7675750/](#). Accessed March 22, 2021.
46. Özturan İU, Köse B, Özkan B, Köse A. Myopericarditis caused by severe acute respiratory syndrome coronavirus 2. *Clinical and Experimental Emergency Medicine* 2020;7:326–329. Available at: [/pmc/articles/PMC7808828/](#). Accessed June 19, 2021.
47. Caraffa R, Marcolongo R, Bottio T, et al. Recurrent autoimmune myocarditis in a young woman during the coronavirus disease 2019 pandemic. *ESC Heart Failure* 2021;8:756–760. Available at: [/pmc/articles/PMC7753829/](#). Accessed June 19, 2021.
48. Gauchotte G, Venard V, Segondy M, et al. SARS-Cov-2 fulminant myocarditis: an autopsy and histopathological case study. *International Journal of Legal Medicine* 2021;135:577–581. Available at: <https://pubmed.ncbi.nlm.nih.gov/33392658/>. Accessed June 19, 2021.
49. Cairns L, Abed El Khaleq Y, Storrar W, Scheuermann-Freestone M. COVID-19 myopericarditis with cardiac tamponade in the absence of respiratory symptoms: a case report. *Journal of Medical Case Reports* 2021;15:1–4. Available at: <https://doi.org/10.1186/s13256-020-02618-z>. Accessed June 19, 2021.
50. Gioia MA, Okunade A, Friedman A, Ahmed MF, Syed RA. A Case of Myopericarditis and Cardiac Tamponade as the Initial Presentation of COVID-19 Infection. *Cureus* 2021;13. Available at: <https://pubmed.ncbi.nlm.nih.gov/33654630/>. Accessed June 19, 2021.
51. Ford J, Holmes J, Jones R. Cardioembolic Stroke in a Patient with Coronavirus Disease of 2019 (COVID-19) Myocarditis: A Case Report. *Clinical Practice and Cases in Emergency Medicine* 2020;4:332–335. Available at: [/pmc/articles/PMC7434261/](#). Accessed June 19, 2021.
52. Tiwary T, Baiswar S, Jinnur P. A Rare Case of COVID-19 Myocarditis With Cardiac Tamponade in a Young Diabetic Adult With Renal Failure. *Cureus* 2020;12. Available at: <https://www.cureus.com/articles/42335->

a-rare-case-of-covid-19-myocarditis-with-cardiac-tamponade-in-a-young-diabetic-adult-with-renal-failure.

Accessed June 19, 2021.

53. Meel R, Ramsamy TD, Narsing R, Wong M. Focal myocarditis in a young male with SARS-CoV-2

infection. *Oxford Medical Case Reports* 2021;2021. Available at:

<https://pubmed.ncbi.nlm.nih.gov/33614052/>. Accessed June 19, 2021.

54. Trpkov C, MacMullan P, Feuchter P, et al. Rapid Response to Cytokine Storm Inhibition Using Anakinra

in a Patient With COVID-19 Myocarditis. *CJC Open* 2021;3:210–213. Available at:

<https://pubmed.ncbi.nlm.nih.gov/33073222/>. Accessed June 19, 2021.

55. Fischer Q, Brillat-Savarin N, Ducrocq G, et al. Case report of an isolated myocarditis due to COVID-19

infection in a paediatric patient. *European Heart Journal - Case Reports* 2020;4:1. Available at:

</pmc/articles/PMC7528934/>. Accessed June 19, 2021.

56. Kohli U, Meinert E, Chong G, Teshar M, Jani P. Fulminant myocarditis and atrial fibrillation in child with

acute COVID-19. *Journal of Electrocardiology* 2020. Available at:

<https://pubmed.ncbi.nlm.nih.gov/33268052/>. Accessed June 19, 2021.

57. Sassone B, Muser D, Bruno A, et al. Concealed SARS-CoV-2 interstitial pneumonia unmasked by infarct-

like acute myocarditis. *European Heart Journal - Case Reports* 2020;4. Available at:

<https://pubmed.ncbi.nlm.nih.gov/33089041/>. Accessed June 19, 2021.

58. Bemtgen X, Klingel K, Hufnagel M, et al. Case Report: Lymphohistiocytic Myocarditis With Severe

Cardiogenic Shock Requiring Mechanical Cardiocirculatory Support in Multisystem Inflammatory Syndrome

Following SARS-CoV-2 Infection. *Frontiers in Cardiovascular Medicine* 2021;0:1091. Available at:

<https://www.frontiersin.org/articles/10.3389/fcvm.2021.716198/full>. Accessed September 30, 2021.

59. Tseng Y-S, Herron C, Garcia R, Cashen K. Sustained ventricular tachycardia in a paediatric patient with

acute COVID-19 myocarditis. *Cardiology in the Young* 2021;31:1510–1512. Available at:

<https://www.cambridge.org/core/journals/cardiology-in-the-young/article/sustained-ventricular->

tachycardia-in-a-paediatric-patient-with-acute-covid19-

myocarditis/E6EAF81386BED3EF6C86AA028EDF89F. Accessed October 1, 2021.

60. Belli O, Ardissino M, Bottiroli M, et al. Emergency cardiac imaging for coronavirus disease 2019 (COVID-19) in practice: a case of takotsubo stress cardiomyopathy. *Cardiovascular Ultrasound* 2021 19:1

2021;19:1–4. Available at: <https://cardiovascularultrasound.biomedcentral.com/articles/10.1186/s12947-021-00251-4>. Accessed October 2, 2021.

61. Nedeljkovic IP, Giga V, Ostojic M, et al. Focal Myocarditis after Mild COVID-19 Infection in Athletes.

*Diagnostics* 2021;11:1519. Available at: </pmc/articles/PMC8392699/>. Accessed October 2, 2021.

62. Singh M, Mehta N, Hayat F, et al. Recurrent Chest Pain after COVID-19: Diagnostic Utility of Cardiac

Magnetic Resonance Imaging. *CJC Open* 2021;0. Available at:

<http://www.cjopen.ca/article/S2589790X21002201/fulltext>. Accessed October 2, 2021.

63. Ishikura H, Maruyama J, Hoshino K, et al. Coronavirus disease (COVID-19) associated delayed-onset fulminant myocarditis in patient with a history of severe acute respiratory syndrome coronavirus 2 (SARS-

CoV-2) infection. *Journal of Infection and Chemotherapy* 2021. Available at: </pmc/articles/PMC8358135/>.

Accessed October 2, 2021.

64. Gaudriot B, Mansour A, Thibault V, et al. Successful heart transplantation for COVID-19-associated

post-infectious fulminant myocarditis. *ESC Heart Failure* 2021;8:2625–2630. Available at:

<https://onlinelibrary.wiley.com/doi/full/10.1002/ehf2.13326>. Accessed October 2, 2021.

65. Meyer M, Vogel T, Meyer A, et al. Presence of active myocarditis at the 6 month follow-up

appointment for a severe form of COVID-19: a case report. *ESC Heart Failure* 2021. Available at:

<https://onlinelibrary.wiley.com/doi/full/10.1002/ehf2.13461>. Accessed October 2, 2021.

66. Menter T, Cueni N, Gebhard EC, Tzankov A. Case Report: Co-occurrence of Myocarditis and Thrombotic

Microangiopathy Limited to the Heart in a COVID-19 Patient. *Frontiers in Cardiovascular Medicine*

2021;0:809.

67. Gaine S, Devitt P, Coughlan JJ, Pearson I. COVID-19-associated myocarditis presenting as new-onset heart failure and atrial fibrillation. *BMJ Case Reports CP* 2021;14:e244027. Available at: <https://casereports.bmj.com/content/14/7/e244027>. Accessed October 2, 2021.
68. Ghafoor K, Ahmed A, Abbas M. Fulminant Myocarditis With ST Elevation and Cardiogenic Shock in a SARS-CoV-2 Patient. *Cureus* 2021;13. Available at: <https://www.cureus.com/articles/62442-fulminant-myocarditis-with-st-elevation-and-cardiogenic-shock-in-a-sars-cov-2-patient>. Accessed October 2, 2021.
69. Ziaie N, Maleh PA, Ramandi MMA, Pourkia R, Latifi K, Mansouri D. Transient left ventricular clot in COVID-19-related myocarditis is associated with hypereosinophilic syndrome: a case report. *The International Journal of Cardiovascular Imaging* 2021;1. Available at: </pmc/articles/PMC8220422/>. Accessed October 2, 2021.
70. Osorio Martínez A, González-Razo VT, Navarro-Sánchez V, Souto Meiriño CA, Ahumada-Ayala M. Sars-cov-2-related subacute thyroiditis, myocarditis, and hepatitis after full resolution of covid-19 serum markers. *American Journal of Case Reports* 2021;22.
71. Boylan M, Roddy J, Lim N, Morgan R, McAdam B, Kiernan F. Recovery of a critically ill patient with COVID-19 myocarditis. *Irish Journal of Medical Science (1971 -)* 2021 2021;1–5. Available at: <https://link.springer.com/article/10.1007/s11845-021-02681-5>. Accessed October 2, 2021.
72. Roest S, Brugts JJ, Kampen JJA van, et al. COVID-19-related myocarditis post-heart transplantation. *International Journal of Infectious Diseases* 2021;107:34–36. Available at: <http://www.ijidonline.com/article/S1201971221003246/fulltext>. Accessed October 2, 2021.
73. Das BB. SARS-CoV-2 Myocarditis in a High School Athlete after COVID-19 and Its Implications for Clearance for Sports. *Children* 2021;8. Available at: </pmc/articles/PMC8223786/>. Accessed October 3, 2021.
74. Ghugre NR, Orbach A, Biswas L, et al. Suspected subclinical myocarditis detected by cardiac magnetic resonance imaging late post COVID-19 recovery. *Journal of Cardiology Cases* 2021;0. Available at:

<http://www.journalofcardiologycases.com/article/S1878540921000694/fulltext>. Accessed October 3, 2021.

75. Pérez-Acosta G, Santana-Cabrera L, Blanco-López J, Martín-González JC. COVID-19 myopericarditis: A case report. *Revista Clinica Espanola* 2021;221:312. Available at: </pmc/articles/PMC7983304/>. Accessed October 3, 2021.

76. Taouihar S, Bouabdallaoui A, Aabdi M, et al. ST elevation revealing acute myocarditis with SARS cov 2 infection: Case report. *Annals of Medicine and Surgery* 2021;65:102313.

77. Berg N, Ilonze O, Bajpai V, Guglin M, Rao R. Acute Biventricular Heart Failure After COVID-19 Infection in an Orthotropic Heart Transplant Patient: A Case Report. *Transplantation Proceedings* 2021;53:1224–1226.

78. Kogan EA, Berezovskiy YS, Blagova O v., Kukleva AD, Bogacheva GA, Kurilina E v. Miocarditis in patients with covid-19 confirmed by immunohistochemical. *Kardiologiya* 2020;60:4–10.

79. Ng MY, Ferreira VM, Leung ST, et al. Patients Recovered From COVID-19 Show Ongoing Subclinical Myocarditis as Revealed by Cardiac Magnetic Resonance Imaging. *JACC: Cardiovascular Imaging* 2020;13:2476–2478. Available at: <https://doi.org/10.1016/j.jcmg.2020.08.012>. Accessed March 21, 2021.

80. Bajaj R, Sinclair HC, Patel K, et al. Delayed-onset myocarditis following COVID-19. *The Lancet Respiratory Medicine* 2021;9:e32–e34. Available at: <https://doi.org/10.1161/>. Accessed June 19, 2021.

81. Maurus S, Weckbach LT, Marschner C, et al. Differences in Cardiac Magnetic Resonance Imaging Markers Between Patients With COVID-19-associated Myocardial Injury and Patients With Clinically Suspected Myocarditis. *Journal of Thoracic Imaging* 2021;36:279–285. Available at: [https://journals.lww.com/thoracicimaging/Fulltext/2021/09000/Differences\\_in\\_Cardiac\\_Magnetic\\_Resonance\\_Imaging.2.aspx](https://journals.lww.com/thoracicimaging/Fulltext/2021/09000/Differences_in_Cardiac_Magnetic_Resonance_Imaging.2.aspx). Accessed September 30, 2021.

82. Daniels CJ, Rajpal S, Greenshields JT, et al. Prevalence of Clinical and Subclinical Myocarditis in Competitive Athletes With Recent SARS-CoV-2 Infection: Results From the Big Ten COVID-19 Cardiac

Registry. JAMA Cardiology 2021;6:1078–1087. Available at:

<https://jamanetwork.com/journals/jamacardiology/fullarticle/2780548>. Accessed October 1, 2021.

83. Starekova J, Bluemke DA, Bradham WS, et al. Evaluation for Myocarditis in Competitive Student Athletes Recovering From Coronavirus Disease 2019 With Cardiac Magnetic Resonance Imaging. JAMA Cardiology 2021;6:945–950. Available at:

<https://jamanetwork.com/journals/jamacardiology/fullarticle/2775372>. Accessed October 2, 2021.

84. Dal Ferro M, Bussani R, Paldino A, et al. SARS-CoV-2, myocardial injury and inflammation: insights from a large clinical and autopsy study. Clinical Research in Cardiology 2021 2021:1–10. Available at:

<https://link.springer.com/article/10.1007/s00392-021-01910-2>. Accessed October 2, 2021.

85. Garg A, Hakeem H, Chennu G, et al. Left ventricular mural thrombi with multisystem thrombosis in patients with COVID-19 and myocardial injury: a case series. European Heart Journal: Case Reports 2021;5.

Available at: </pmc/articles/PMC8276321/>. Accessed October 2, 2021.

86. Galea N, Marchitelli L, Pambianchi G, et al. T2-mapping increase is the prevalent imaging biomarker of myocardial involvement in active COVID-19: a Cardiovascular Magnetic Resonance study. Journal of Cardiovascular Magnetic Resonance 2021;23:68. Available at: </pmc/articles/PMC8189727/>. Accessed

October 2, 2021.

87. Małek ŁA, Marczak M, Miłośz-Wieczorek B, et al. Cardiac involvement in consecutive elite athletes recovered from Covid-19: A magnetic resonance study. Journal of Magnetic Resonance Imaging

2021;53:1723–1729. Available at: </pmc/articles/PMC8014772/>. Accessed October 3, 2021.

88. Kotecha T, Knight DS, Razvi Y, et al. Patterns of myocardial injury in recovered troponin-positive COVID-19 patients assessed by cardiovascular magnetic resonance. European Heart Journal 2021;42:1866.

Available at: </pmc/articles/PMC7928984/>. Accessed October 3, 2021.

89. Joy G, Artico J, Kurdi H, et al. Prospective Case-Control Study of Cardiovascular Abnormalities 6 Months Following Mild COVID-19 in Healthcare Workers. JACC: Cardiovascular Imaging 2021.

90. Petersen M, Mehrad B, Keeley EC. Acute myocarditis during the COVID-19 pandemic: A single center experience. *American Heart Journal plus* 2021;5:100030. Available at: [/pmc/articles/PMC8223126/](#). Accessed October 3, 2021.
91. Inciardi RM, Lupi L, Zacccone G, et al. Cardiac Involvement in a Patient with Coronavirus Disease 2019 (COVID-19). *JAMA Cardiology* 2020;5:819–824. Available at: <https://pubmed.ncbi.nlm.nih.gov/32219357/>. Accessed April 26, 2021.
92. Bernal-Torres W, Herrera-Escandón Á, Hurtado-Rivera M, Plata-Mosquera CA. COVID-19 fulminant myocarditis: a case report Savarese G, Stolfo D, Ferrannini G, Camm CF, editors. *European Heart Journal - Case Reports* 2020;4:1–6. Available at: <https://academic.oup.com/ehjcr/article/4/FI1/1/5868575>. Accessed March 13, 2021.
93. Zeng JH, Liu YX, Yuan J, et al. First case of COVID-19 complicated with fulminant myocarditis: a case report and insights. *Infection* 2020;48:773–777. Available at: <https://pubmed.ncbi.nlm.nih.gov/32277408/>. Accessed April 26, 2021.
